# Supplementary material
Source: PubMed Central journal article supplement (PMC5602412)
Supplement: 10.1074_M117.791343_jbc.M117.791343-1.pdf [file 10.1074_M117.791343_jbc.M117.791343-1.pdf]

**Pyruvate kinase M knockdown induced signaling via AMP-activated protein kinase promotes mitochondrial biogenesis, autophagy, and cancer cell survival**

**Gopinath Prakasam<sup>1</sup>, Rajnish Kumar Singh<sup>1,2</sup>, Mohammad Askandar Iqbal<sup>1,3</sup>, Sunil Kumar Saini<sup>1</sup>, Ashu Bhan Tikku<sup>4</sup>, Rameshwar N.K. Bamezai<sup>1,\*</sup>**

**Author's affiliations**

1. National Center for Applied Human Genetics, School of Life Sciences, Jawaharlal Nehru University, New Delhi 110067, India. 2. Department of Microbiology and Tumor Virology Program of the Abramson Cancer Center, Perelman School of Medicine, University of Pennsylvania, Philadelphia, Pennsylvania 19104. 3. Department of Biotechnology, Faculty of Natural Sciences, Jamia Millia Islamia, New Delhi 110025, India. 4. Radiation and Cancer Therapeutics Laboratory, School of Life Science, Jawaharlal Nehru University, New Delhi 110067, India.

\* Correspondence: School of Life Sciences, Jawaharlal Nehru University, New Delhi-110067, India. Fax: 0091-11-26742211. E-mail: [bamezai@hotmail.com](mailto:bamezai@hotmail.com).

**Running Title:** PKM knockdown activates AMPK to prevent cancer cell death.

**Table S1.** List of proteins identified as PKM1 interacting partners using LC/MS-MS.

| <b>Accession I.D.</b> | <b>Entry</b> | <b>Description</b>                                          | <b>Mass (Da)</b> | <b>Peptides</b> | <b>Coverage (%)</b> | <b>PLGS Score</b> |
|-----------------------|--------------|-------------------------------------------------------------|------------------|-----------------|---------------------|-------------------|
| <b>P63261</b>         | ACTG         | Actin cytoplasmic 2                                         | 41765            | 13              | 31.4667             | 892.889           |
| <b>P12814</b>         | ACTN1        | Alpha actinin 1                                             | 102992           | 32              | 28.5874             | 623.7095          |
| <b>O43707</b>         | ACTN4        | Alpha actinin 4                                             | 104788           | 58              | 48.5181             | 1891.53           |
| <b>P04083</b>         | ANXA1        | Annexin A1                                                  | 38689            | 14              | 28.9017             | 336.3753          |
| <b>P07355</b>         | ANXA2        | Annexin A2                                                  | 38651            | 12              | 28.9086             | 850.7295          |
| <b>P48047</b>         | ATPO         | ATP synthase subunit O mitochondrial                        | 23262            | 7               | 33.8028             | 315.8188          |
| <b>P33993</b>         | MCM7         | DNA replication licensing factor MCM7                       | 81256            | 24              | 32.267              | 712.8558          |
| <b>P68104</b>         | EF1A1        | Elongation factor 1 alpha 1                                 | 50109            | 33              | 47.8355             | 4913.585          |
| <b>P24534</b>         | EF1B         | Elongation factor 1 beta                                    | 24748            | 3               | 10.6667             | 411.1423          |
| <b>P04075</b>         | ALDOA        | Fructose biphosphate aldolase A                             | 39395            | 14              | 48.3517             | 1219.534          |
| <b>P04406</b>         | G3P          | Glyceraldehyde 3 phosphate dehydrogenase                    | 36030            | 26              | 60.597              | 1782.219          |
| <b>P11142</b>         | HSP7C        | Heat shock cognate 71 kDa protein                           | 70827            | 16              | 22.1362             | 524.3831          |
| <b>P22392-2</b>       | NDKB         | Isoform 3 of Nucleoside diphosphate kinase B                | 30117            | 15              | 36.7041             | 1039.605          |
| <b>Q9H254-4</b>       | SPTN4        | Isoform 4 of Spectrin beta chain non erythrocytic 4         | 243272           | 20              | 12.0241             | 281.8018          |
| <b>P14618-2</b>       | KPYM         | Isoform M1 of Pyruvate kinase isozymes M1 M2                | 58025            | 24              | 40.678              | 584.7386          |
| <b>Q06830</b>         | PRDX1        | Peroxiredoxin 1                                             | 22096            | 10              | 38.191              | 1235.415          |
| <b>Q15102</b>         | PA1B3        | Platelet activating factor acetylhydrolase IB subunit gamma | 25718            | 10              | 37.2294             | 333.5217          |
| <b>P0CG48</b>         | UBC          | Polyubiquitin C                                             | 85533            | 32              | 31.5374             | 1067.547          |
| <b>Q5VTE0</b>         | EF1A3        | Putative elongation factor 1 alpha like 3                   | 50153            | 26              | 38.961              | 3000.535          |
| <b>A6NJU9</b>         | NPIL5        | Putative NPIP like protein LOC613037                        | 125886           | 20              | 20.826              | 242.025           |
| <b>P14618</b>         | KPYM         | Pyruvate kinase isozymes M1 M2                              | 57900            | 29              | 43.5028             | 896.5508          |
| <b>Q8WXA9</b>         | SREK1        | Splicing regulatory glutamine lysine rich protein 1         | 59345            | 32              | 24.2126             | 298.4866          |
| <b>P17987</b>         | TCPA         | T complex protein 1 subunit alpha                           | 60410            | 12              | 22.6619             | 496.8228          |
| <b>P78371</b>         | TCPB         | T complex protein 1 subunit beta                            | 57452            | 16              | 42.243              | 524.3919          |
| <b>Q99832</b>         | TCPH         | T complex protein 1 subunit eta G                           | 59328            | 17              | 21.7311             | 673.8492          |

|               |       |                                      |       |    |         |          |
|---------------|-------|--------------------------------------|-------|----|---------|----------|
| <b>P49368</b> | TCPG  | T complex protein 1 subunit gamma    | 60495 | 19 | 32.6605 | 740.262  |
| <b>P50990</b> | TCPQ  | T complex protein 1 subunit theta GN | 59582 | 21 | 34.854  | 483.6839 |
| <b>P40227</b> | TCPZ  | T complex protein 1 subunit zeta     | 57987 | 19 | 34.6516 | 658.8874 |
| <b>P29401</b> | TKT   | Transketolase                        | 67834 | 16 | 29.695  | 325.851  |
| <b>P68363</b> | TBA1B | Tubulin alpha 1B chain               | 50119 | 35 | 44.1242 | 5546.314 |
| <b>P07437</b> | TBB5  | Tubulin beta chain                   | 49638 | 39 | 43.6937 | 2897.446 |

**Table S2.** In silico subcellular localization prediction of PKM isoforms (PKM1 and PKM2).

| Software       | Localization                                                                                                                                                                                                  |                                                                                                                                                                                                               | Basis of Prediction                                                                                                                                   |
|----------------|---------------------------------------------------------------------------------------------------------------------------------------------------------------------------------------------------------------|---------------------------------------------------------------------------------------------------------------------------------------------------------------------------------------------------------------|-------------------------------------------------------------------------------------------------------------------------------------------------------|
|                | PKM1                                                                                                                                                                                                          | PKM2                                                                                                                                                                                                          |                                                                                                                                                       |
| CELLO v.2.5    | <p>Cytoplasm</p> <p>RELIABILITY:</p> <p>Cytoplasmic 2.831</p> <p>Mitochondrial 0.958</p> <p>Nuclear 0.043</p> <p>Peroxisomal 0.116</p> <p>Cytoskeletal 0.020</p> <p>Plasma Membrane 0.009</p> <p>ER 0.007</p> | <p>Cytoplasm</p> <p>RELIABILITY:</p> <p>Cytoplasmic 2.940</p> <p>Mitochondrial 0.958</p> <p>Nuclear 0.055</p> <p>Peroxisomal 0.111</p> <p>Cytoskeletal 0.029</p> <p>Plasma Membrane 0.014</p> <p>ER 0.007</p> | Amino acid composition and its physicochemical properties (1).                                                                                        |
| HSLpred        | Mitochondrial Protein.                                                                                                                                                                                        | Cytoplasmic Protein.                                                                                                                                                                                          | Support vector machine-based hybrid modules that involves amino acid composition, dipeptide compositions and evolutionary informations of protein (2) |
| Hum-mPLOC 2.0. | Cytoplasm and Mitochondrion                                                                                                                                                                                   | Cytoplasm and Mitochondrion                                                                                                                                                                                   | Gene ontology, functional domains and sequential evolutionary information (3)                                                                         |
| SubLoc v1.0    | <p>Mitochondrial</p> <p>Expected accuracy = 74 %</p>                                                                                                                                                          | <p>Mitochondrial</p> <p>Expected accuracy = 56 %</p>                                                                                                                                                          | Uses vector support machine Amino acid composition (4)                                                                                                |

|         |                                                                                                                                          |                                                                                                                                            |                                                                                          |
|---------|------------------------------------------------------------------------------------------------------------------------------------------|--------------------------------------------------------------------------------------------------------------------------------------------|------------------------------------------------------------------------------------------|
| YLoc    | <p><b>Cytoplasm</b></p> <p>Probability:</p> <p>Cytoplasm 80.2%,<br/>Nucleus 16.9%,<br/>Mitochondrion 3.0%,<br/>Secreted pathway 0.0%</p> | <p><b>Cytoplasm</b></p> <p>Probability:</p> <p>Cytoplasm 88.2%,<br/>Nucleus 7.9 %,<br/>Mitochondrion 3.8 %,<br/>Secreted pathway 0.0 %</p> | Sequence-based predictions (amino acid composition, sorting signals) (5)                 |
| BaCelLo | <p>Cytoplasm LOCALIZATION STEPS:</p> <p>Intracellular -<br/>Nucleus or<br/>Cytoplasm -<br/>Cytoplasm</p>                                 | <p>Cytoplasm LOCALIZATION STEPS:</p> <p>Intracellular -<br/>Nucleus or<br/>Cytoplasm -<br/>Cytoplasm</p>                                   | Support vector machine-based amino acid compositions of both the N- and C- terminal (6). |

**Supplementary Table S2. In silico subcellular localization prediction of PKM isoforms.** The methods to predict subcellular Localization of PKM1 and PKM2 were acquired from Zambo et al. (7) where the amino acid sequence of PKM isoforms PKM1 (P14618-2) and PKM2 (P14618) was examined using six online computational tools that employs different algorithms to predict the subcellular localization of PKM isoforms.

1. Yu, C. S., Chen, Y. C., Lu, C. H., and Hwang, J. K. (2006) Prediction of protein subcellular localization. *Proteins* **64**, 643-651
2. Garg, A., Bhasin, M., and Raghava, G. P. (2005) Support vector machine-based method for subcellular localization of human proteins using amino acid compositions, their order, and similarity search. *The Journal of biological chemistry* **280**, 14427-14432
3. Chou, K. C., and Shen, H. B. (2006) Hum-PLoc: a novel ensemble classifier for predicting human protein subcellular localization. *Biochemical and biophysical research communications* **347**, 150-157
4. Hua, S., and Sun, Z. (2001) Support vector machine approach for protein subcellular localization prediction. *Bioinformatics* **17**, 721-728
5. Briesemeister, S., Rahnenfuhrer, J., and Kohlbacher, O. (2010) Going from where to why-- interpretable prediction of protein subcellular localization. *Bioinformatics* **26**, 1232-1238
6. Pierleoni, A., Martelli, P. L., Fariselli, P., and Casadio, R. (2006) BaCelLo: a balanced subcellular localization predictor. *Bioinformatics* **22**, e408-416
7. Zambo, V., Toth, M., Schlachter, K., Szelenyi, P., Sarnyai, F., Lotz, G., Csala, M., and Kereszturi, E. (2016) Cytosolic localization of NADH cytochrome b(5) oxidoreductase (Ncb5or). *FEBS letters* **590**, 661-671
